# Supplementary material
Source: PubMed Central journal article supplement (PMC2098799)
Supplement: pgen.0030204.st001.pdf [file pgen.0030204.st001.pdf]

**Table S1**

| information about splicing motif |                         |                                |                     |                   |           |           |                 | GC content motif |                        |                          |                                               | measurements of single-strandedness |           |       |       |           |        |       |           |        |
|----------------------------------|-------------------------|--------------------------------|---------------------|-------------------|-----------|-----------|-----------------|------------------|------------------------|--------------------------|-----------------------------------------------|-------------------------------------|-----------|-------|-------|-----------|--------|-------|-----------|--------|
| motif number                     | AEDB entry <sup>a</sup> | species                        | enhancer / silencer | exonic / intronic | gene name | motif     | length of motif | motif            | upstream 30 nt context | downstream 30 nt context | upstream context + motif + downstream context | EF20                                | PU20      | ED20  | EF30  | PU30      | ED30   | EF50  | PU50      | ED50   |
| 1                                | db001                   | Homo_sapiens                   | ESE                 | exonic            | CFTR      | GATGAC    | 6               | 0.5              | 0.233                  | 0.367                    | 0.318                                         | 0.675                               | 0.381     | 0.686 | 0.573 | 0.244     | 1.137  | 0.507 | 0.149     | 1.524  |
| 2                                | db004                   | Homo_sapiens                   | ESS                 | exonic            | FN1       | CAAGG     | 5               | 0.6              | 0.533                  | 0.567                    | 0.554                                         | 0.507                               | 0.004     | 3.625 | 0.513 | 0.004     | 3.669  | 0.421 | 0.005     | 4.172  |
| 3                                | db005                   | Gallus_gallus                  | ESS                 | exonic            | FINC      | CATGG     | 5               | 0.6              | 0.6                    | 0.5                      | 0.554                                         | 0.379                               | 0.003     | 3.623 | 0.328 | 0.002     | 3.858  | 0.3   | 0.002     | 4.057  |
| 4                                | db006                   | Homo_sapiens                   | ESE                 | exonic            | FN1       | GAAGAAGA  | 8               | 0.375            | 0.5                    | 0.667                    | 0.559                                         | 0.821                               | 0.016     | 2.59  | 0.75  | 0.011     | 2.869  | 0.741 | 0.01      | 2.893  |
| 5                                | db007                   | Homo_sapiens                   | ESS                 | exonic            | FN1       | AAGTTTCC  | 8               | 0.375            | 0.533                  | 0.6                      | 0.544                                         | 0.571                               | 0.124     | 2.78  | 0.479 | 0.067     | 3.537  | 0.469 | 0.034     | 4.356  |
| 6                                | db008                   | Gallus_gallus                  | ESE                 | exonic            | FINC      | GAAGAAGAC | 9               | 0.444            | 0.633                  | 0.633                    | 0.609                                         | 0.774                               | 0.047     | 2.029 | 0.737 | 0.031     | 2.312  | 0.7   | 0.021     | 2.551  |
| 7                                | db019                   | Homo_sapiens                   | ISE                 | intronic          | GH1       | GGGGATGGG | 9               | 0.778            | 0.6                    | 0.7                      | 0.667                                         | 0.218                               | 5.24E-007 | 9.295 | 0.2   | 3.00E-007 | 10.375 | 0.171 | 1.53E-007 | 11.363 |
| 8                                | db038                   | Human immunodeficiency virus 1 | ESE                 | exonic            | tat       | GAAGAAGAA | 9               | 0.333            | 0.667                  | 0.5                      | 0.551                                         | 0.983                               | 0.856     | 0.097 | 0.986 | 0.881     | 0.08   | 0.904 | 0.598     | 0.55   |
| 9                                | db040                   | Human immunodeficiency virus 1 | ESS                 | exonic            | tat       | TTGGGT    | 6               | 0.5              | 0.367                  | 0.5                      | 0.439                                         | 0.26                                | 0.018     | 4.114 | 0.219 | 0.009     | 5.246  | 0.236 | 0.005     | 5.658  |
| 10                               | db042                   | Human immunodeficiency virus 1 | ESS                 | exonic            | env       | GAAAGGAGA | 9               | 0.444            | 0.4                    | 0.333                    | 0.377                                         | 0.718                               | 0.304     | 1.639 | 0.551 | 0.156     | 2.681  | 0.487 | 0.078     | 4.151  |
| 11                               | db043                   | Human immunodeficiency virus 1 | ESS                 | exonic            | tat       | AGATCC    | 6               | 0.5              | 0.5                    | 0.4                      | 0.455                                         | 0.52                                | 0.032     | 2.59  | 0.406 | 0.016     | 3.678  | 0.319 | 0.009     | 3.916  |
| 12                               | db044                   | Human immunodeficiency virus 1 | ESS                 | exonic            | tat       | TTAG      | 4               | 0.25             | 0.5                    | 0.5                      | 0.484                                         | 0.999                               | 0.998     | 0.001 | 0.998 | 0.996     | 0.002  | 0.985 | 0.974     | 0.016  |
| 13                               | db049                   | Rattus_norvegicus              | ESE                 | exonic            | beta-TM   | GAGGAGGAG | 9               | 0.667            | 0.567                  | 0.5                      | 0.551                                         | 0.422                               | 1.72E-006 | 8.379 | 0.398 | 5.30E-006 | 7.959  | 0.353 | 6.40E-006 | 7.677  |
| 14                               | db049                   | Rattus_norvegicus              | ESE                 | exonic            | beta-TM   | GAGGAGGAG | 9               | 0.667            | 0.8                    | 0.567                    | 0.681                                         | 0.588                               | 0.001     | 4.743 | 0.457 | 0         | 6.09   | 0.358 | 0         | 6.687  |
| 15                               | db052                   | Rattus_norvegicus              | ESS                 | exonic            | beta-TM   | TGTGGG    | 6               | 0.667            | 0.6                    | 0.467                    | 0.545                                         | 0.185                               | 3.59E-006 | 8.227 | 0.178 | 2.00E-006 | 8.909  | 0.177 | 1.02E-006 | 9.739  |
| 16                               | db053                   | Rattus_norvegicus              | ESE                 | exonic            | beta-TM   | GAAGAAGAG | 9               | 0.444            | 0.333                  | 0.467                    | 0.406                                         | 0.538                               | 0.031     | 2.36  | 0.554 | 0.056     | 1.991  | 0.525 | 0.037     | 2.442  |
| 17                               | db058                   | Homo_sapiens                   | ESS                 | exonic            | FGFR2     | TAGG      | 4               | 0.5              | 0.3                    | 0.633                    | 0.469                                         | 0.685                               | 0.058     | 2.261 | 0.38  | 0.029     | 4.161  | 0.362 | 0.017     | 4.378  |
| 18                               | db065                   | Homo_sapiens                   | ESE                 | exonic            | CD44      | CAACCACAA | 9               | 0.444            | 0.467                  | 0.4                      | 0.435                                         | 0.618                               | 0.003     | 3.629 | 0.623 | 0.009     | 3.403  | 0.729 | 0.08      | 2.292  |
| 19                               | db075                   | Homo_sapiens                   | ESE                 | exonic            | PTPRC     | AACACCT   | 7               | 0.429            | 0.633                  | 0.5                      | 0.552                                         | 0.753                               | 0.143     | 1.265 | 0.763 | 0.139     | 1.294  | 0.799 | 0.284     | 0.94   |
| 20                               | db078                   | Homo_sapiens                   | ESS                 | exonic            | PTPRC     | ACTCGCA   | 7               | 0.571            | 0.633                  | 0.633                    | 0.627                                         | 0.583                               | 0.004     | 3.528 | 0.538 | 0.003     | 3.71   | 0.507 | 0.002     | 3.751  |
| 21                               | db079                   | Homo_sapiens                   | ESE                 | exonic            | CALCA     | TTTTTCCCC | 9               | 0.444            | 0.267                  | 0.467                    | 0.377                                         | 0.378                               | 0.037     | 4.291 | 0.357 | 0.018     | 5.527  | 0.398 | 0.033     | 4.128  |
| 22                               | db083                   | Rous sarcoma virus             | ESS                 | exonic            | gag       | GGGG      | 4               | 1                | 0.533                  | 0.533                    | 0.563                                         | 0.781                               | 0.324     | 0.81  | 0.783 | 0.341     | 0.735  | 0.767 | 0.327     | 0.776  |
| 23                               | db083                   | Rous sarcoma virus             | ESS                 | exonic            | gag       | GGG       | 3               | 1                | 0.6                    | 0.467                    | 0.556                                         | 0.806                               | 0.41      | 0.556 | 0.825 | 0.473     | 0.47   | 0.801 | 0.422     | 0.543  |
| 24                               | db085                   | Human adenovirus type 2        | ESE                 | exonic            | E1A       | GACGACGAG | 9               | 0.667            | 0.633                  | 0.433                    | 0.551                                         | 0.805                               | 0.229     | 1.081 | 0.848 | 0.335     | 0.792  | 0.844 | 0.339     | 0.732  |
| 25                               | db087                   | Human adenovirus type 2        | ESE                 | exonic            | E1A       | GATGAAGAG | 9               | 0.444            | 0.633                  | 0.433                    | 0.522                                         | 0.852                               | 0.258     | 1.496 | 0.821 | 0.136     | 2.058  | 0.807 | 0.075     | 2.343  |
| 26                               | db089                   | Homo_sapiens                   | ESE                 | exonic            | BRCA1     | GCTGAGT   | 7               | 0.571            | 0.333                  | 0.367                    | 0.373                                         | 0.669                               | 0.007     | 3.382 | 0.694 | 0.004     | 3.563  | 0.662 | 0.003     | 3.694  |
| 27                               | db091                   | Homo_sapiens                   | ESE                 | exonic            | MAPT      | AATAAGAAG | 9               | 0.222            | 0.367                  | 0.5                      | 0.406                                         | 0.82                                | 0.216     | 0.971 | 0.85  | 0.166     | 1.296  | 0.814 | 0.103     | 1.639  |
| 28                               | db101                   | Homo_sapiens                   | ESS                 | exonic            | ATP5C1    | AGTTCCA   | 7               | 0.429            | 0.233                  | 0.4                      | 0.328                                         | 0.573                               | 0.348     | 2.007 | 0.391 | 0.176     | 2.811  | 0.46  | 0.221     | 2.038  |
| 29                               | db102                   | Mice minute virus              | ESE                 | exonic            | NS2       | GAAGAAAGA | 9               | 0.333            | 0.567                  | 0.567                    | 0.536                                         | 0.584                               | 1.25E-005 | 7.543 | 0.572 | 0         | 6.323  | 0.57  | 0         | 5.723  |
| 30                               | db103                   | Mice minute virus              | ESE                 | exonic            | NS2       | CACCA     | 5               | 0.6              | 0.433                  | 0.533                    | 0.492                                         | 0.917                               | 0.766     | 0.173 | 0.926 | 0.786     | 0.152  | 0.862 | 0.596     | 0.427  |
| 31                               | db103                   | Mice minute virus              | ESE                 | exonic            | NS2       | ACACC     | 5               | 0.6              | 0.533                  | 0.5                      | 0.523                                         | 0.924                               | 0.746     | 0.191 | 0.919 | 0.721     | 0.208  | 0.905 | 0.679     | 0.262  |

|    |       |                           |     |          |           |           |   |       |       |       |       |       |       |       |       |           |       |       |       |       |
|----|-------|---------------------------|-----|----------|-----------|-----------|---|-------|-------|-------|-------|-------|-------|-------|-------|-----------|-------|-------|-------|-------|
| 32 | db107 | Homo_sapiens              | ESE | exonic   | SMN1      | AAAGAAGG  | 8 | 0.375 | 0.333 | 0.367 | 0.353 | 0.758 | 0.184 | 2.541 | 0.638 | 0.092     | 3.715 | 0.488 | 0.046 | 4.756 |
| 33 | db109 | Homo_sapiens              | ESS | exonic   | SMN1      | TAGACA    | 6 | 0.333 | 0.3   | 0.367 | 0.333 | 0.809 | 0.286 | 0.773 | 0.774 | 0.247     | 0.886 | 0.707 | 0.184 | 1.106 |
| 34 | db110 | Homo_sapiens              | ESE | exonic   | SFRS7     | GAAGAAGAA | 9 | 0.333 | 0.467 | 0.267 | 0.362 | 0.907 | 0.786 | 0.171 | 0.784 | 0.58      | 0.541 | 0.679 | 0.415 | 0.814 |
| 35 | db116 | Gallus_gallus             | ESS | exonic   | MYPT1     | AACACAAG  | 8 | 0.375 | 0.367 | 0.367 | 0.368 | 0.732 | 0.312 | 0.808 | 0.764 | 0.357     | 0.684 | 0.772 | 0.38  | 0.622 |
| 36 | db117 | Mus_musculus              | ESS | exonic   | Epb4.1    | ATAGCA    | 6 | 0.333 | 0.333 | 0.3   | 0.318 | 0.537 | 0.02  | 2.623 | 0.451 | 0.01      | 3.788 | 0.384 | 0.006 | 4.142 |
| 37 | db123 | Homo_sapiens              | ESE | exonic   | TPM3      | AAGTGTT   | 7 | 0.286 | 0.333 | 0.533 | 0.418 | 0.757 | 0.093 | 1.492 | 0.722 | 0.085     | 1.871 | 0.693 | 0.079 | 1.772 |
| 38 | db125 | Gallus_gallus             | ESE | exonic   | TRT2      | GAGGAAGAA | 9 | 0.444 | 0.533 | 0.533 | 0.522 | 0.816 | 0.603 | 0.328 | 0.669 | 0.386     | 1.061 | 0.422 | 0.193 | 4.34  |
| 39 | db131 | Homo_sapiens              | ESS | exonic   | CFTR      | GGGGG     | 5 | 1     | 0.3   | 0.567 | 0.477 | 0.677 | 0.363 | 0.726 | 0.591 | 0.277     | 0.914 | 0.627 | 0.253 | 0.919 |
| 40 | db151 | Mus_musculus              | ISE | intronic | Agrn      | ATCTTTTGT | 9 | 0.222 | 0.5   | 0.5   | 0.464 | 0.769 | 0.246 | 0.995 | 0.76  | 0.265     | 0.917 | 0.778 | 0.329 | 0.761 |
| 41 | db152 | Mus_musculus              | ISE | intronic | Agrn      | ACTCACCC  | 7 | 0.571 | 0.467 | 0.433 | 0.463 | 0.914 | 0.713 | 0.209 | 0.738 | 0.395     | 1.014 | 0.654 | 0.259 | 1.216 |
| 42 | db152 | Mus_musculus              | ISE | intronic | Agrn      | TTACC     | 5 | 0.4   | 0.5   | 0.4   | 0.446 | 0.993 | 0.978 | 0.013 | 0.993 | 0.978     | 0.014 | 0.976 | 0.904 | 0.078 |
| 43 | db155 | Homo_sapiens              | ISE | intronic | APP       | ATGTTT    | 6 | 0.167 | 0.533 | 0.233 | 0.364 | 0.877 | 0.716 | 0.208 | 0.812 | 0.57      | 0.383 | 0.773 | 0.46  | 0.529 |
| 44 | db156 | Homo_sapiens              | ISS | intronic | APP       | TTT       | 3 | 0     | 0.433 | 0.2   | 0.302 | 0.985 | 0.957 | 0.027 | 0.981 | 0.945     | 0.035 | 0.975 | 0.929 | 0.045 |
| 45 | db164 | Homo_sapiens              | ESE | exonic   | TRA2B     | GAAAGAA   | 7 | 0.286 | 0.2   | 0.433 | 0.313 | 0.895 | 0.661 | 0.27  | 0.838 | 0.438     | 0.609 | 0.818 | 0.364 | 0.685 |
| 46 | db164 | Homo_sapiens              | ESE | exonic   | TRA2B     | GAAAGAAG  | 8 | 0.375 | 0.4   | 0.3   | 0.353 | 0.838 | 0.108 | 1.41  | 0.855 | 0.111     | 1.372 | 0.858 | 0.166 | 1.164 |
| 47 | db164 | Homo_sapiens              | ESE | exonic   | TRA2B     | GAAGAAGG  | 8 | 0.5   | 0.267 | 0.367 | 0.338 | 0.778 | 0.544 | 0.721 | 0.422 | 0.273     | 3.234 | 0.284 | 0.136 | 5.136 |
| 48 | db167 | Mus_musculus              | ISS | intronic | Casp2     | TTTCTCTC  | 8 | 0.375 | 0.4   | 0.6   | 0.485 | 0.997 | 0.976 | 0.015 | 0.997 | 0.974     | 0.016 | 0.996 | 0.967 | 0.02  |
| 49 | db167 | Mus_musculus              | ISS | intronic | Casp2     | TCTTC     | 5 | 0.4   | 0.367 | 0.367 | 0.369 | 0.871 | 0.651 | 0.349 | 0.868 | 0.505     | 0.491 | 0.867 | 0.434 | 0.559 |
| 50 | db170 | Mus_musculus              | ISS | intronic | Src       | TCTCTCT   | 7 | 0.429 | 0.567 | 0.6   | 0.567 | 0.96  | 0.689 | 0.237 | 0.95  | 0.604     | 0.321 | 0.929 | 0.529 | 0.406 |
| 51 | db170 | Mus_musculus              | ISS | intronic | Src       | CTCTCT    | 6 | 0.5   | 0.633 | 0.6   | 0.606 | 0.981 | 0.9   | 0.066 | 0.927 | 0.707     | 0.375 | 0.774 | 0.374 | 1.381 |
| 52 | db171 | Mus_musculus              | ISS | intronic | Src       | CTCTC     | 5 | 0.6   | 0.7   | 0.633 | 0.662 | 0.714 | 0.009 | 3.024 | 0.701 | 0.008     | 3.188 | 0.681 | 0.007 | 3.315 |
| 53 | db171 | Mus_musculus              | ISE | intronic | Src       | TGCATG    | 6 | 0.5   | 0.667 | 0.6   | 0.621 | 0.803 | 0.128 | 1.278 | 0.809 | 0.131     | 1.259 | 0.825 | 0.136 | 1.234 |
| 54 | db171 | Mus_musculus              | ISE | intronic | Src       | GGGGGCTG  | 8 | 0.875 | 0.633 | 0.633 | 0.662 | 0.625 | 0.002 | 4.081 | 0.665 | 0.002     | 3.961 | 0.577 | 0.001 | 4.223 |
| 55 | db174 | Homo_sapiens              | ISS | intronic | FGFR1     | TGCTGC    | 6 | 0.667 | 0.433 | 0.433 | 0.455 | 0.377 | 0.028 | 2.294 | 0.389 | 0.02      | 2.576 | 0.385 | 0.018 | 2.603 |
| 56 | db174 | Homo_sapiens              | ISS | intronic | FGFR1     | TTGCCTCT  | 8 | 0.5   | 0.467 | 0.467 | 0.471 | 0.835 | 0.454 | 0.514 | 0.802 | 0.421     | 0.942 | 0.597 | 0.21  | 4.312 |
| 57 | db174 | Homo_sapiens              | ISS | intronic | FGFR1     | CTGCTTCC  | 8 | 0.625 | 0.433 | 0.333 | 0.412 | 0.681 | 0.01  | 3.213 | 0.681 | 0.014     | 2.917 | 0.596 | 0.016 | 3.032 |
| 58 | db175 | Homo_sapiens              | ISS | intronic | FGFR1     | TGCTGC    | 6 | 0.667 | 0.567 | 0.633 | 0.606 | 0.444 | 0.09  | 1.662 | 0.478 | 0.095     | 1.545 | 0.51  | 0.068 | 1.762 |
| 59 | db175 | Homo_sapiens              | ISS | intronic | FGFR1     | TGCCTGC   | 7 | 0.714 | 0.533 | 0.6   | 0.582 | 0.37  | 0.002 | 4.665 | 0.349 | 0.001     | 4.739 | 0.331 | 0.001 | 5.38  |
| 60 | db187 | Rattus_norvegicus         | ISE | intronic | GBRG2     | ACAAATCCA | 9 | 0.333 | 0.3   | 0.4   | 0.348 | 0.805 | 0.318 | 0.926 | 0.806 | 0.233     | 1.056 | 0.744 | 0.144 | 1.507 |
| 61 | db190 | Mus_musculus              | ISS | intronic | P70370    | TAGAGT    | 6 | 0.333 | 0.367 | 0.367 | 0.364 | 0.684 | 0.314 | 0.846 | 0.683 | 0.206     | 1.138 | 0.681 | 0.15  | 1.296 |
| 62 | db196 | Bovine papillomavirus - 1 | ESS | exonic   | late mRNA | TCTTCTT   | 7 | 0.286 | 0.633 | 0.733 | 0.642 | 0.876 | 0.33  | 0.728 | 0.881 | 0.483     | 0.503 | 0.882 | 0.559 | 0.392 |
| 63 | db198 | Bovine papillomavirus - 1 | ESS | exonic   | late mRNA | GGCTCCCC  | 9 | 0.889 | 0.6   | 0.7   | 0.681 | 0.667 | 0     | 5.682 | 0.658 | 9.98E-005 | 5.775 | 0.635 | 0     | 5.798 |
| 64 | db200 | Bovine papillomavirus - 1 | ESS | exonic   | late mRNA | AGAGCAGG  | 8 | 0.625 | 0.733 | 0.7   | 0.706 | 0.446 | 0     | 5.281 | 0.422 | 0         | 5.429 | 0.313 | 0     | 6.484 |
| 65 | db202 | Bovine papillomavirus - 1 | ESS | exonic   | late mRNA | TGGT      | 4 | 0.5   | 0.567 | 0.5   | 0.531 | 0.183 | 0.002 | 4.389 | 0.242 | 0.001     | 5.048 | 0.255 | 0.001 | 5.174 |
| 66 | db206 | Bovine papillomavirus - 1 | ESE | exonic   | late mRNA | GAAGAA    | 6 | 0.333 | 0.633 | 0.6   | 0.591 | 0.683 | 0.21  | 1.09  | 0.647 | 0.129     | 1.507 | 0.647 | 0.082 | 1.79  |
| 67 | db206 | Bovine papillomavirus - 1 | ESE | exonic   | late mRNA | GAAGAA    | 6 | 0.333 | 0.6   | 0.633 | 0.591 | 0.882 | 0.409 | 0.889 | 0.858 | 0.244     | 1.226 | 0.837 | 0.156 | 1.449 |

|    |       |                   |     |          |          |           |   |       |       |       |       |       |       |       |       |       |       |       |       |       |
|----|-------|-------------------|-----|----------|----------|-----------|---|-------|-------|-------|-------|-------|-------|-------|-------|-------|-------|-------|-------|-------|
| 68 | db212 | Mus_musculus      | ISS | intronic | Kcnma1   | CTCTTCCTC | 9 | 0.556 | 0.5   | 0.5   | 0.507 | 0.973 | 0.815 | 0.132 | 0.947 | 0.683 | 0.25  | 0.921 | 0.628 | 0.427 |
| 69 | db214 | Homo_sapiens      | ISS | intronic | MAPT     | TCACACGT  | 8 | 0.5   | 0.667 | 0.533 | 0.588 | 0.132 | 0     | 5.462 | 0.112 | 0.001 | 5.016 | 0.1   | 0     | 5.206 |
| 70 | db215 | Homo_sapiens      | ISS | intronic | MAPT     | CCCATGCG  | 8 | 0.75  | 0.6   | 0.467 | 0.559 | 0.583 | 0.085 | 2.069 | 0.574 | 0.044 | 2.943 | 0.537 | 0.031 | 3.787 |
| 71 | db216 | Rattus_norvegicus | ISE | intronic | THA      | GAGGGAG   | 7 | 0.714 | 0.6   | 0.567 | 0.597 | 0.899 | 0.618 | 0.297 | 0.892 | 0.61  | 0.305 | 0.89  | 0.605 | 0.31  |
| 72 | db216 | Rattus_norvegicus | ISE | intronic | THA      | GGGTG     | 5 | 0.8   | 0.567 | 0.667 | 0.631 | 0.713 | 0.199 | 1.057 | 0.769 | 0.194 | 1.043 | 0.763 | 0.183 | 1.065 |
| 73 | db219 | Rattus_norvegicus | ISS | intronic | alpha-TM | TCTTCTT   | 7 | 0.286 | 0.367 | 0.6   | 0.463 | 0.999 | 0.991 | 0.006 | 0.975 | 0.85  | 0.149 | 0.784 | 0.477 | 1.905 |
| 74 | db231 | Gallus_gallus     | ISE | intronic | MYPT1    | TCTTGCTT  | 9 | 0.333 | 0.367 | 0.267 | 0.319 | 0.442 | 0.013 | 3.396 | 0.379 | 0.007 | 5.918 | 0.379 | 0.006 | 4.957 |
| 75 | db239 | Homo_sapiens      | ESE | exonic   | CFTR     | GGATAC    | 6 | 0.5   | 0.3   | 0.2   | 0.273 | 0.533 | 0.012 | 2.811 | 0.353 | 0.007 | 3.466 | 0.337 | 0.005 | 3.535 |
| 76 | db239 | Homo_sapiens      | ESE | exonic   | CFTR     | AAGATGC   | 7 | 0.429 | 0.267 | 0.3   | 0.299 | 0.453 | 0     | 4.808 | 0.426 | 0.001 | 4.569 | 0.456 | 0.001 | 4.64  |
| 77 | db284 | Mus_musculus      | ESE | exonic   | ATP5C1   | AATGAAAA  | 8 | 0.125 | 0.267 | 0.433 | 0.324 | 0.655 | 0.029 | 2.256 | 0.663 | 0.075 | 1.922 | 0.578 | 0.054 | 2.03  |

<sup>a</sup> identifier for each AEDB motif database entry; please note that the literature references in one entry can describe more than one splicing motif
