# Supplementary material
Source: PubMed Central journal article supplement (PMC2098799)
Supplement: pgen.0030204.st002.pdf [file pgen.0030204.st002.pdf]

|                               | number of motifs | average PU |         |            |         |            |         | average EF |         |            |         |            |         | average ED |         |            |         |            |         |
|-------------------------------|------------------|------------|---------|------------|---------|------------|---------|------------|---------|------------|---------|------------|---------|------------|---------|------------|---------|------------|---------|
|                               |                  | 11...20 nt |         | 11...30 nt |         | 11...50 nt |         | 11...20 nt |         | 11...30 nt |         | 11...50 nt |         | 11...20 nt |         | 11...30 nt |         | 11...50 nt |         |
| splicing motifs               | 77               | 0.29       |         | 0.25       |         | 0.21       |         | 0.69       |         | 0.65       |         | 0.62       |         | 2.17       |         | 2.49       |         | 2.77       |         |
| exonic splicing motifs        | 50               | 0.23       |         | 0.19       |         | 0.16       |         | 0.67       |         | 0.62       |         | 0.59       |         | 2.41       |         | 2.77       |         | 3.02       |         |
| intronic splicing motifs      | 27               | 0.40       |         | 0.35       |         | 0.29       |         | 0.73       |         | 0.71       |         | 0.67       |         | 1.72       |         | 1.96       |         | 2.32       |         |
| control 1                     | 100 x 77         | 0.18       | P<0.01  | 0.15       | P<0.01  | 0.13       | P<0.01  | 0.63       | P<0.01  | 0.59       | P<0.01  | 0.55       | P<0.01  | 2.59       | P<0.03  | 2.86       | P<0.04  | 3.16       | P<0.02  |
| control 2                     | 100 x 77         | 0.21       | P<0.01  | 0.18       | P<0.01  | 0.15       | P<0.01  | 0.64       | P<0.02  | 0.60       | P<0.01  | 0.57       | P<0.01  | 2.60       | P<0.04  | 2.91       | P<0.05  | 3.19       | P<0.04  |
| control 3                     | 100 x 77         | 0.18       | P<0.01  | 0.15       | P<0.01  | 0.12       | P<0.01  | 0.63       | P<0.01  | 0.59       | P<0.01  | 0.55       | P<0.01  | 2.61       | P<0.01  | 2.91       | P<0.01  | 3.22       | P<0.02  |
| control 4                     | 10000            | 0.14       | P<0.020 | 0.12       | P<0.023 | 0.09       | P<0.018 | 0.60       | P<0.005 | 0.57       | P<0.047 | 0.53       | P<0.046 | 2.83       | P=0.054 | 3.12       | P=0.154 | 3.40       | P=0.134 |
| control 4 – lower GC content  | 10000            | 0.15       | P=0.051 | 0.12       | P=0.064 | 0.10       | P=0.051 | 0.61       | P<0.013 | 0.58       | P=0.100 | 0.54       | P=0.097 | 2.67       | P=0.140 | 2.95       | P=0.348 | 3.22       | P=0.316 |
| control 4 – equal GC content  | 10000            | 0.15       | P<0.041 | 0.12       | P<0.046 | 0.10       | P<0.034 | 0.61       | P<0.010 | 0.57       | P=0.082 | 0.53       | P=0.069 | 2.73       | P=0.105 | 3.02       | P=0.267 | 3.31       | P=0.220 |
| control 4 – higher GC content | 10000            | 0.12       | P<0.002 | 0.10       | P<0.002 | 0.08       | P<0.002 | 0.59       | P<0.001 | 0.55       | P<0.013 | 0.51       | P<0.012 | 3.07       | P<0.006 | 3.37       | P<0.022 | 3.68       | P<0.017 |
| control 5                     | 10000            | 0.18       | P<0.004 | 0.15       | P<0.003 | 0.12       | P<0.003 | 0.62       | P<0.004 | 0.58       | P<0.001 | 0.54       | P<0.001 | 2.52       | P<0.003 | 2.83       | P<0.002 | 3.14       | P<0.007 |
| control 5 – higher GC content | 10000            | 0.13       | P<0.001 | 0.11       | P<0.001 | 0.08       | P<0.001 | 0.58       | P<0.001 | 0.54       | P<0.001 | 0.50       | P<0.001 | 3.26       | P<0.001 | 3.60       | P<0.001 | 3.97       | P<0.001 |

Table S2: PU, EF, ED values, and P-values for verified splicing motifs and all controls.
