# Supplementary material
Source: PubMed Central journal article supplement (PMC2098799)
Supplement: pgen.0030204.st003.pdf [file pgen.0030204.st003.pdf]

|                               | number of motifs | average GC content |                |                  |
|-------------------------------|------------------|--------------------|----------------|------------------|
|                               |                  | motif              | 30 nt upstream | 30 nt downstream |
| splicing motifs               | 77               | 0.49               | 0.48           | 0.49             |
| exonic splicing motifs        | 50               | 0.49               | 0.47           | 0.48             |
| intronic splicing motifs      | 27               | 0.50               | 0.51           | 0.49             |
| control 1                     | 100 x 77         | 0.48               | 0.48           | 0.49             |
| control 2                     | 100 x 77         | 0.49               | <b>0.49</b>    | 0.49             |
| control 3                     | 100 x 77         | 0.49               | 0.48           | 0.48             |
| control 4                     | 10000            | <b>0.50</b>        | <b>0.50</b>    | <b>0.50</b>      |
| control 4 – lower GC content  | 10000            | 0.47               | 0.46           | 0.47             |
| control 4 – equal GC content  | 10000            | 0.49               | 0.47           | 0.48             |
| control 4 – higher GC content | 10000            | <b>0.57</b>        | <b>0.53</b>    | <b>0.53</b>      |
| control 5                     | 10000            | 0.43               | 0.43           | 0.43             |
| control 5 – higher GC content | 10000            | <b>0.60</b>        | <b>0.55</b>    | <b>0.55</b>      |

**Table S3:** GC content for the verified motif data sets and all controls.
