# Supplementary material
Source: PubMed Central journal article supplement (PMC2098799)
Supplement: pgen.0030204.st004.pdf [file pgen.0030204.st004.pdf]

**exons vs. decoy regions**

selection for single-strandedness in exons:

|                             |                 |                       |                   |
|-----------------------------|-----------------|-----------------------|-------------------|
| 773 of 2268 neutral motifs  | 34.08%          |                       |                   |
| 450 of 867 ESE motifs       | 51.90%          | differential fraction | 17.82%            |
| 149 of 457 ESS motifs       | 32.60%          | differential fraction | -1.48%            |
| <u>Fisher's exact test:</u> | ESE vs. ESS     | P-value: <0.0001      | (odds ratio 2.23) |
|                             | ESE vs. neutral | P-value: <0.0001      | (odds ratio 2.09) |
|                             | ESS vs. neutral | P-value: 0.5517       | (odds ratio 1.07) |

selection for single-strandedness in decoy regions:

|                             |                 |                       |                    |
|-----------------------------|-----------------|-----------------------|--------------------|
| 211 of 353 neutral motifs   | 59.77%          |                       |                    |
| 58 of 112 ESE motifs        | 51.79%          | differential fraction | -7.99%             |
| 36 of 39 ESS motifs         | 92.31%          | differential fraction | 32.53%             |
| <u>Fisher's exact test:</u> | ESE vs. ESS     | P-value: <0.0001      | (odds ratio 11.17) |
|                             | ESE vs. neutral | P-value: 0.1536       | (odds ratio 1.38)  |
|                             | ESS vs. neutral | P-value: <0.0001      | (odds ratio 8.08)  |

**exons vs. pseudo exons**

selection for single-strandedness in exons:

|                             |                 |                       |                   |
|-----------------------------|-----------------|-----------------------|-------------------|
| 684 of 2618 neutral motifs  | 26.13%          |                       |                   |
| 426 of 979 ESE motifs       | 43.51%          | differential fraction | 17.39%            |
| 133 of 496 ESS motifs       | 26.81%          | differential fraction | 0.69%             |
| <u>Fisher's exact test:</u> | ESE vs. ESS     | P-value: <0.0001      | (odds ratio 2.10) |
|                             | ESE vs. neutral | P-value: <0.0001      | (odds ratio 2.18) |
|                             | ESS vs. neutral | P-value: 0.7388       | (odds ratio 0.97) |

selection for single-strandedness in pseudo exons:

|                       |        |                       |   |
|-----------------------|--------|-----------------------|---|
| 2 of 3 neutral motifs | 66.67% |                       |   |
| 0 of 0 ESE motifs     | 0.00%  | differential fraction | - |
| 0 of 0 ESS motifs     | 0.00%  | differential fraction | - |

**exons vs. intron flanks**

selection for single-strandedness in exons:

|                             |                 |                       |                   |
|-----------------------------|-----------------|-----------------------|-------------------|
| 515 of 1820 neutral motifs  | 28.30%          |                       |                   |
| 343 of 675 ESE motifs       | 50.81%          | differential fraction | 22.52%            |
| 145 of 439 ESS motifs       | 33.03%          | differential fraction | 4.73%             |
| <u>Fisher's exact test:</u> | ESE vs. ESS     | P-value: <0.0001      | (odds ratio 2.09) |
|                             | ESE vs. neutral | P-value: <0.0001      | (odds ratio 2.62) |
|                             | ESS vs. neutral | P-value: 0.0537       | (odds ratio 0.80) |

selection for single-strandedness in intron flanks:

|                             |                 |                       |                   |
|-----------------------------|-----------------|-----------------------|-------------------|
| 583 of 801 neutral motifs   | 72.78%          |                       |                   |
| 173 of 304 ESE motifs       | 56.91%          | differential fraction | -15.88%           |
| 52 of 57 ESS motifs         | 91.23%          | differential fraction | 18.44%            |
| <u>Fisher's exact test:</u> | ESE vs. ESS     | P-value: <0.0001      | (odds ratio 7.88) |
|                             | ESE vs. neutral | P-value: <0.0001      | (odds ratio 2.03) |

Table S4: Number of ESEs, ESSs and neutral motifs that are selected for single-strandedness comparing exons with decoy regions, pseudo exons and intron flanks.
