# Supplementary material
Source: PubMed Central journal article supplement (PMC2098799)
Supplement: pgen.0030204.st005.pdf [file pgen.0030204.st005.pdf]

|                                | #winners <sup>a</sup> | total <sup>b</sup> | %     | Fisher's exact test | % difference | Fisher's exact test | % difference                         |
|--------------------------------|-----------------------|--------------------|-------|---------------------|--------------|---------------------|--------------------------------------|
| <b>exons vs. pseudo exons</b>  |                       |                    |       |                     |              |                     |                                      |
| ESE                            | 478                   | 979                | 48.8% | -                   | -            | -                   | -                                    |
| ESS                            | 194                   | 496                | 39.1% | ESE vs. ESS         | P<0.001      | 9.7%                |                                      |
| Neutral                        | 1118                  | 2621               | 42.7% | ESE vs. neutral     | P=0.001      | 6.1%                | ESS vs. neutral <i>P=0.15</i> -3.6%  |
| <b>exons vs. decoy regions</b> |                       |                    |       |                     |              |                     |                                      |
| ESE                            | 513                   | 979                | 52.4% | -                   | -            | -                   | -                                    |
| ESS                            | 193                   | 496                | 38.9% | ESE vs. ESS         | P<0.001      | 13.5%               |                                      |
| Neutral                        | 1198                  | 2621               | 45.7% | ESE vs. neutral     | P<0.001      | 6.7%                | ESS vs. neutral <i>P=0.006</i> -6.8% |
| <b>exons vs. intron flanks</b> |                       |                    |       |                     |              |                     |                                      |
| ESE                            | 489                   | 979                | 49.9% | -                   | -            | -                   | -                                    |
| ESS                            | 202                   | 496                | 40.7% | ESE vs. ESS         | P<0.001      | 9.2%                |                                      |
| Neutral                        | 1119                  | 2621               | 42.7% | ESE vs. neutral     | P<0.001      | 7.2%                | ESS vs. neutral <i>P=0.43</i> -2.0%  |

Table S5: Comparison of PU values of splicing motifs between data sets.
