# Supplementary material
Source: PubMed Central journal article supplement (PMC2098799)
Supplement: pgen.0030204.st006.pdf [file pgen.0030204.st006.pdf]

|                 | #winners <sup>a</sup> | total <sup>b</sup> | %     | # winners <sup>a</sup>      | total <sup>b</sup> | %     | Fisher's exact<br>test | %<br>difference |
|-----------------|-----------------------|--------------------|-------|-----------------------------|--------------------|-------|------------------------|-----------------|
|                 | <b>within exons</b>   |                    |       | <b>within pseudo exons</b>  |                    |       |                        |                 |
| ESE vs. Neutral | 556                   | 979                | 56.8% | 494                         | 979                | 50.5% | P = 0.0057             | 6.3%            |
| ESS vs. Neutral | 108                   | 496                | 21.8% | 156                         | 496                | 31.5% | P = 0.0007             | -9.7%           |
|                 | <b>within exons</b>   |                    |       | <b>within decoy regions</b> |                    |       |                        |                 |
| ESE vs. Neutral | 556                   | 979                | 56.8% | 465                         | 979                | 47.5% | P < 0.0001             | 9.3%            |
| ESS vs. Neutral | 108                   | 496                | 21.8% | 191                         | 496                | 38.5% | P < 0.0001             | -16.7%          |
|                 | <b>within exons</b>   |                    |       | <b>within intron flanks</b> |                    |       |                        |                 |
| ESE vs. Neutral | 556                   | 979                | 56.8% | 471                         | 979                | 48.1% | P = 0.0001             | 8.7%            |
| ESS vs. Neutral | 108                   | 496                | 21.8% | 165                         | 496                | 33.3% | P < 0.0001             | -11.5%          |

Table S6: Comparison of PU values within data sets.
