# Supplementary material
Source: PubMed Central journal article supplement (PMC2098799)

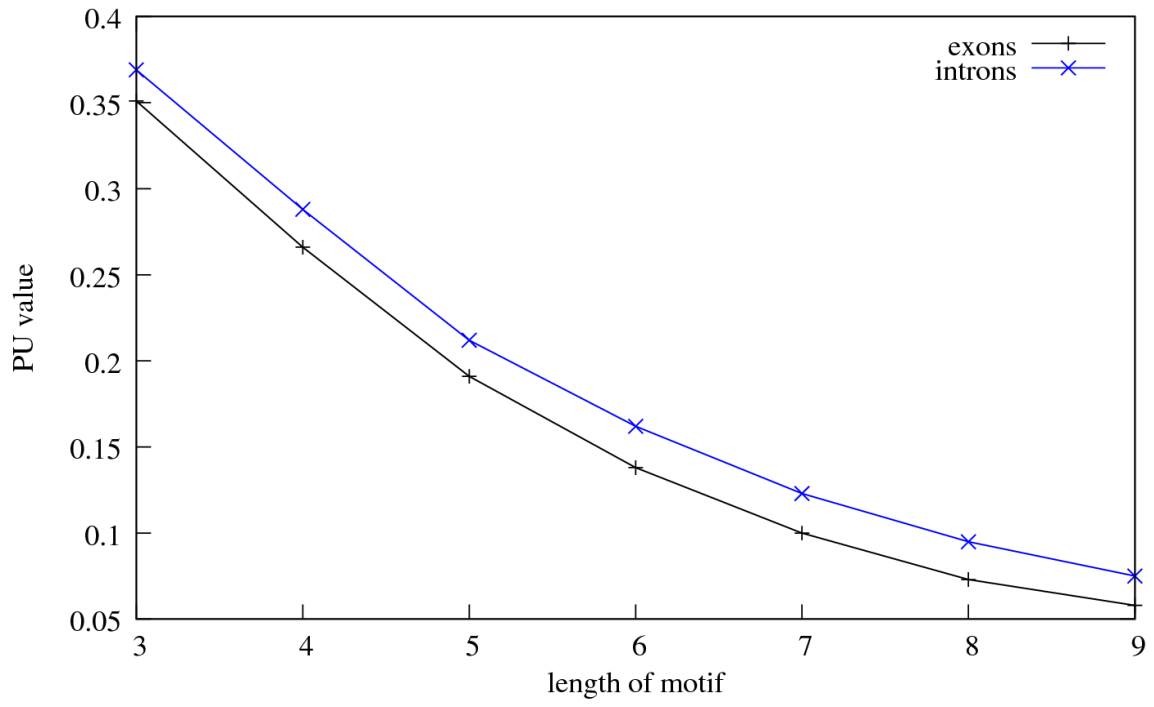

Supplement: pgen.0030204.sg001.pdf [file pgen.0030204.sg001.pdf]

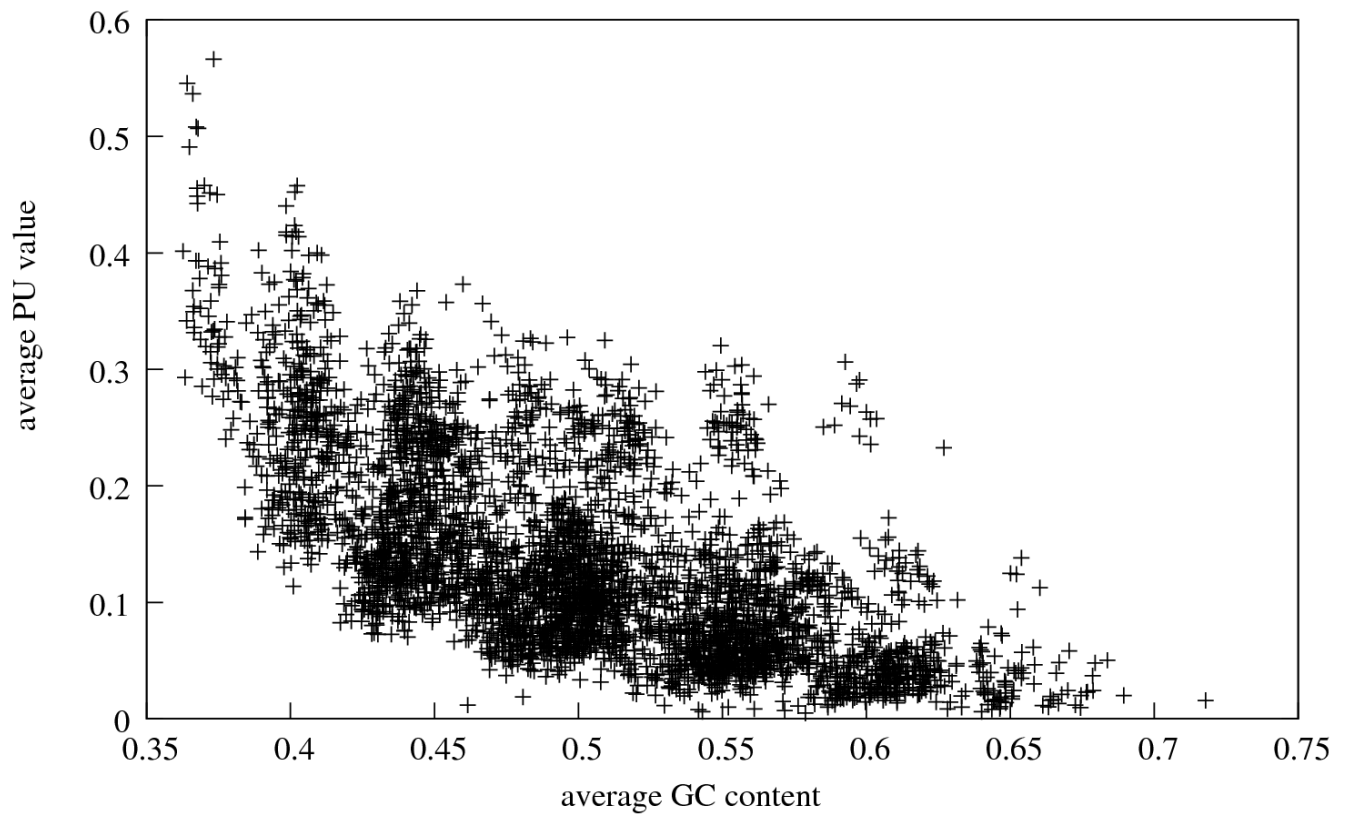

Supplement: pgen.0030204.sg002.pdf [file pgen.0030204.sg002.pdf]

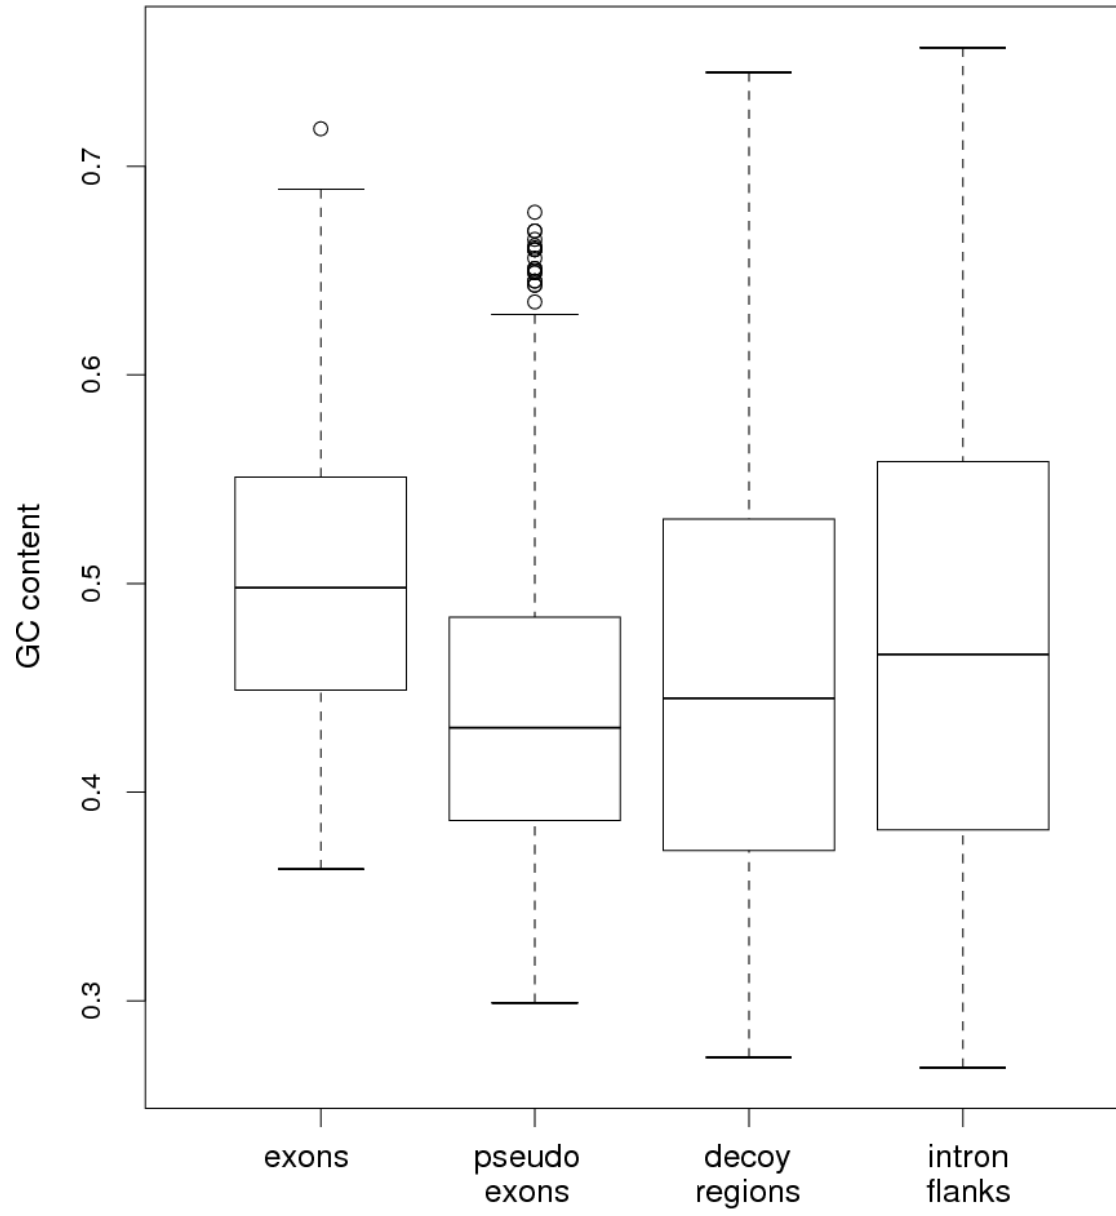

Supplement: pgen.0030204.sg003.pdf [file pgen.0030204.sg003.pdf]

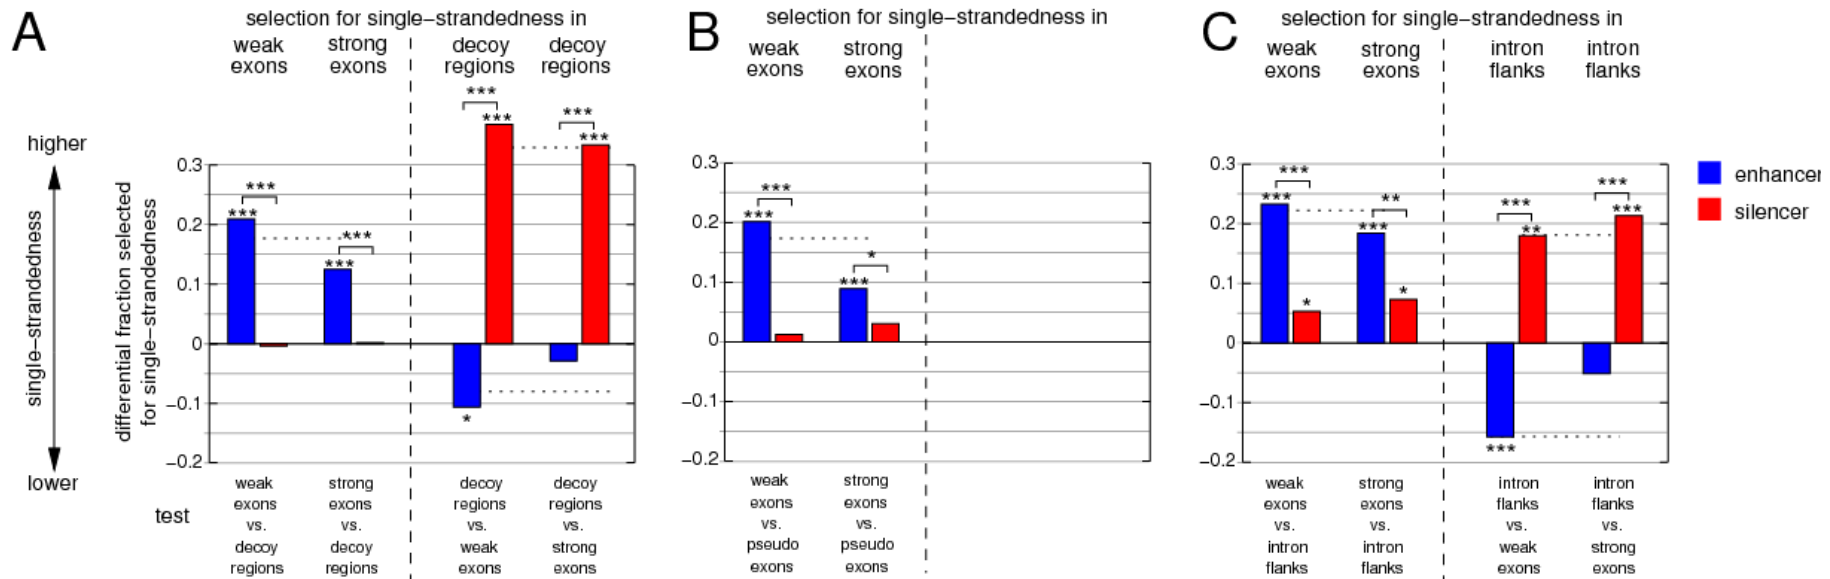

Supplement: pgen.0030204.sg004.pdf [file pgen.0030204.sg004.pdf]

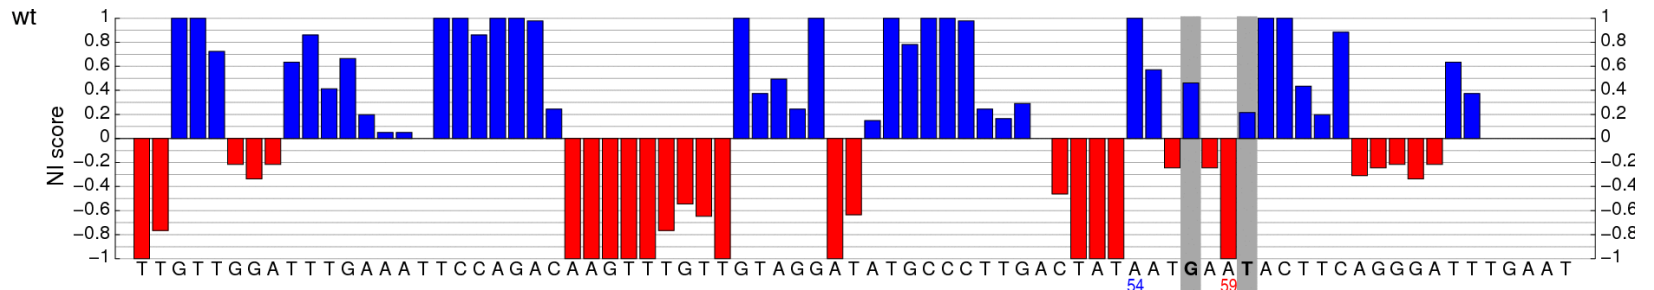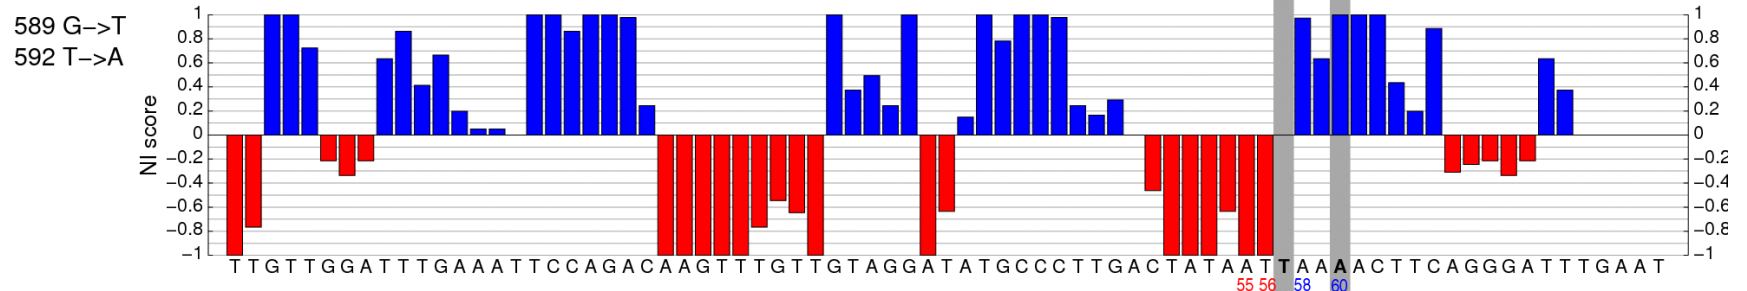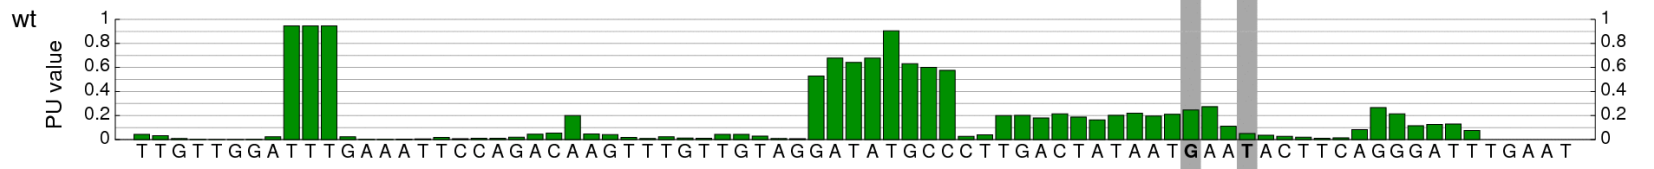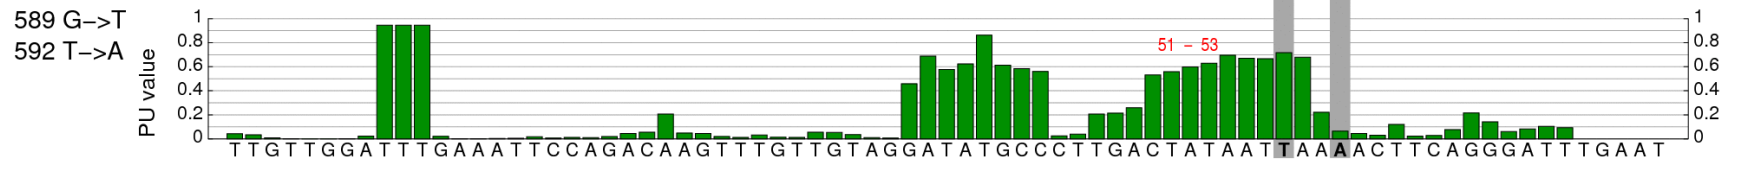

Supplement: pgen.0030204.sg005.pdf [file pgen.0030204.sg005.pdf]

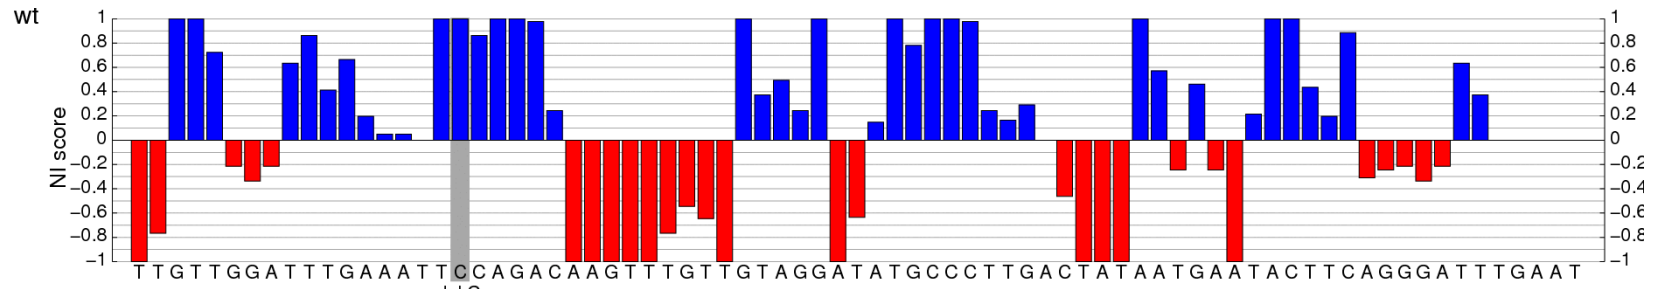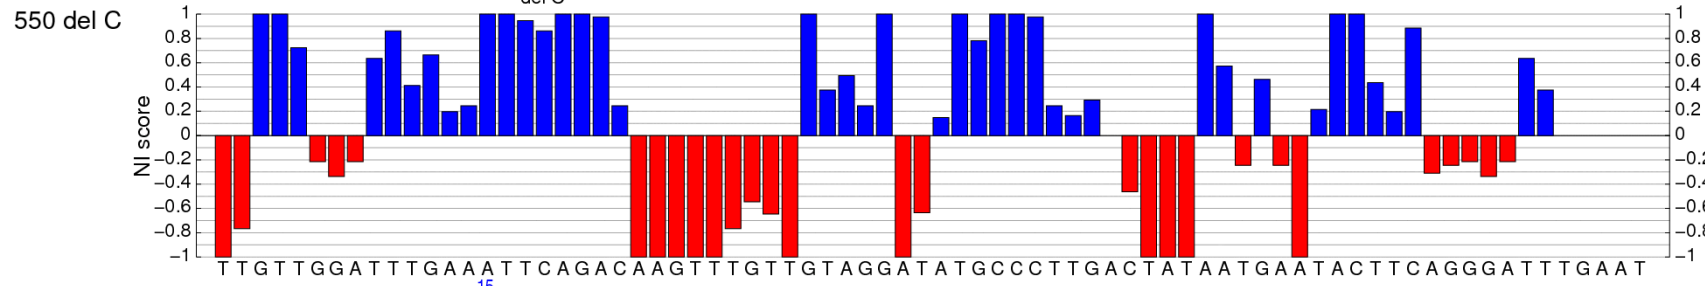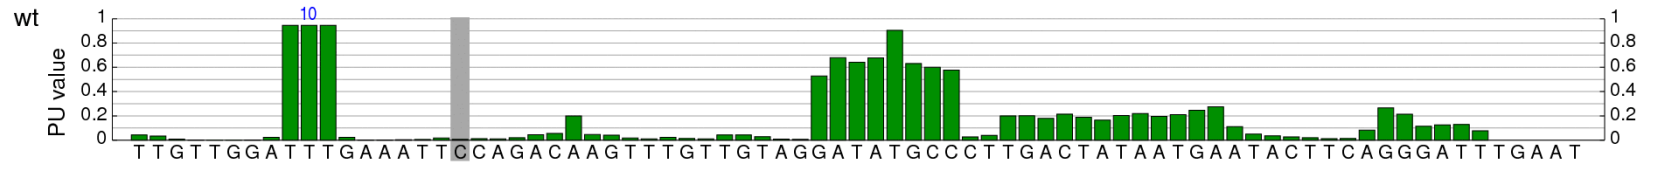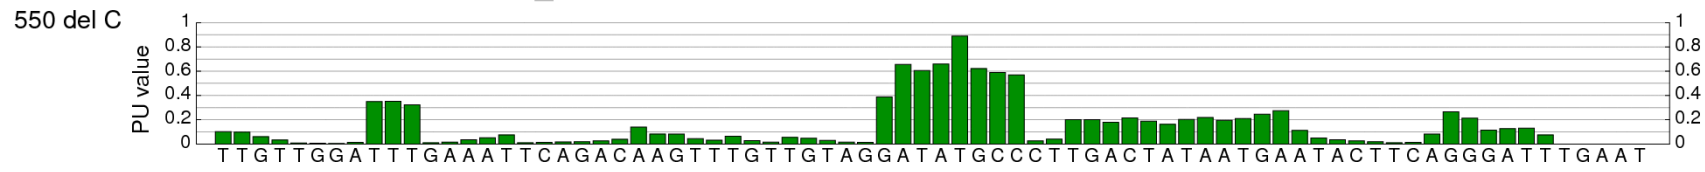

Supplement: pgen.0030204.sg006.pdf [file pgen.0030204.sg006.pdf]

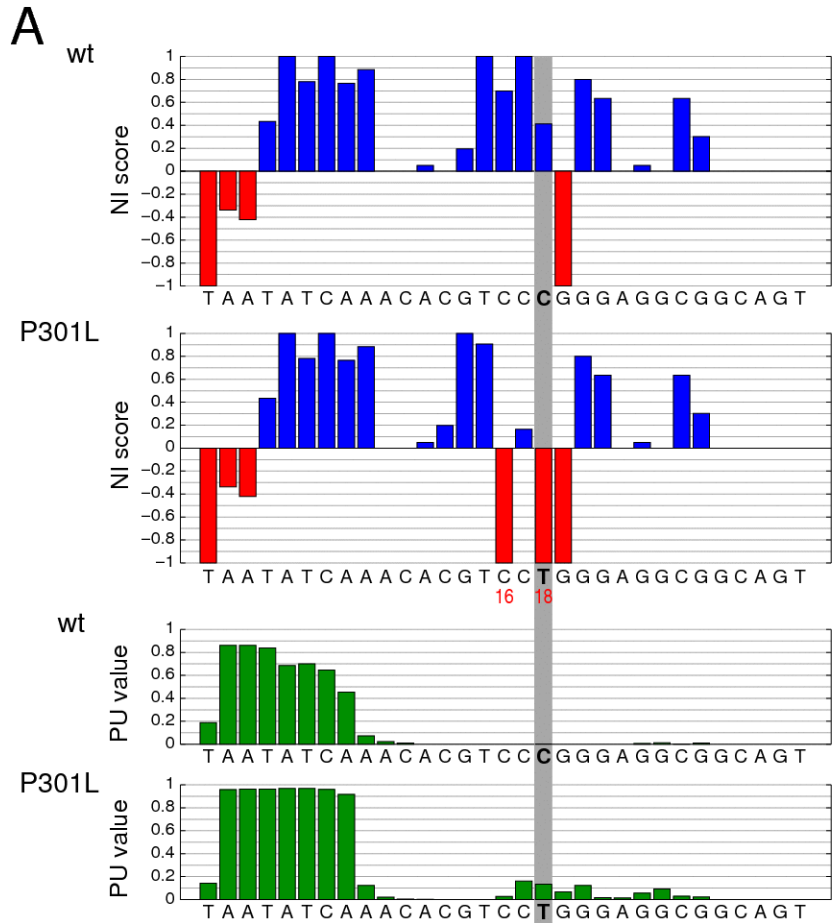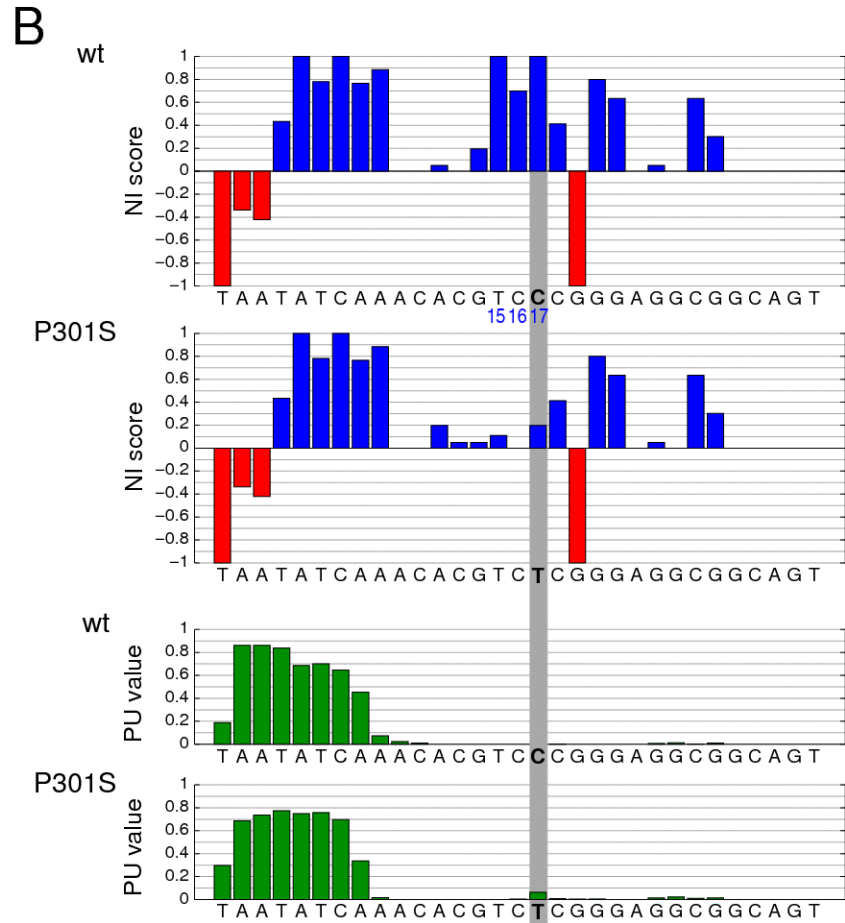

Supplement: pgen.0030204.sg007.pdf [file pgen.0030204.sg007.pdf]

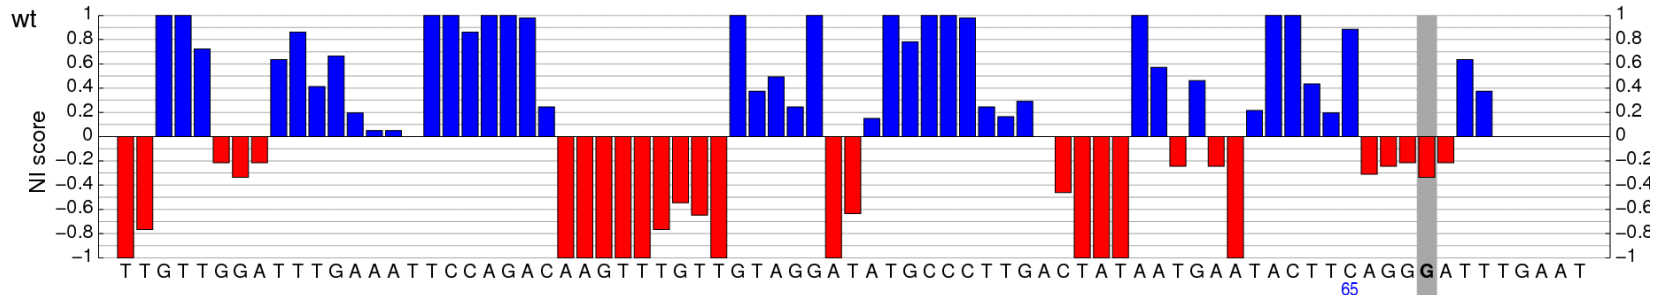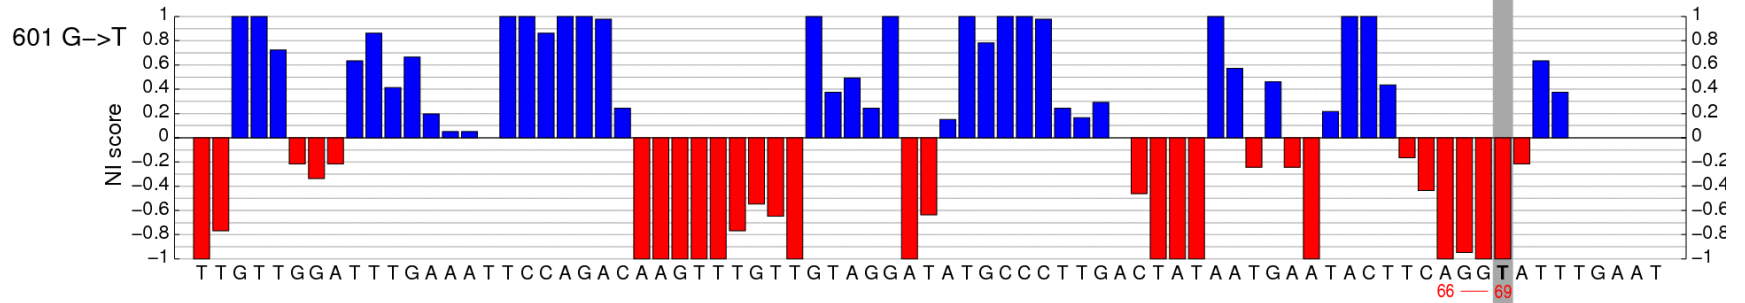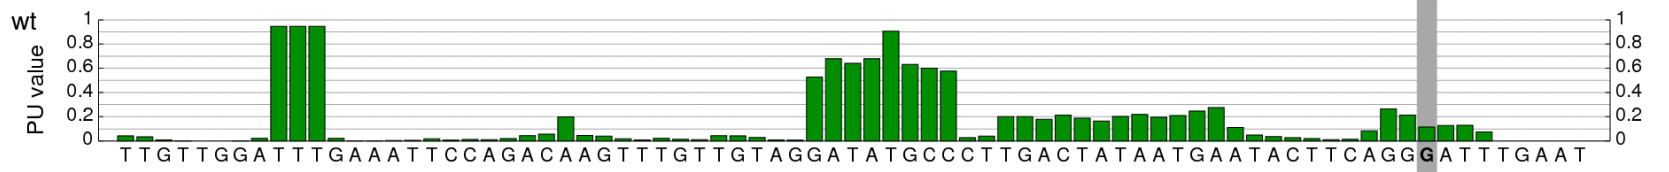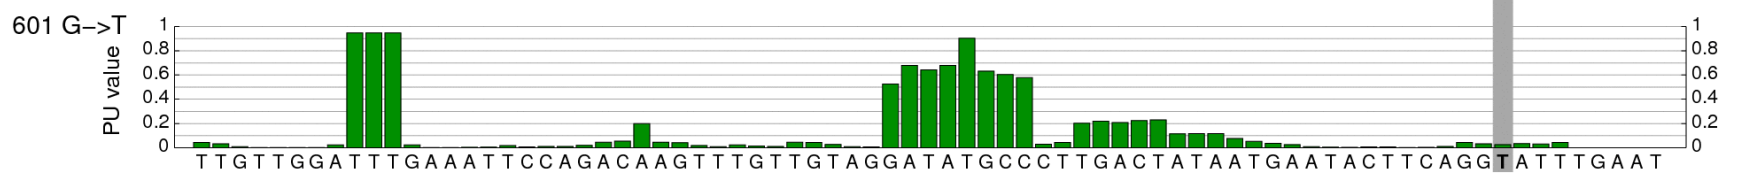

Supplement: pgen.0030204.sg008.pdf [file pgen.0030204.sg008.pdf]

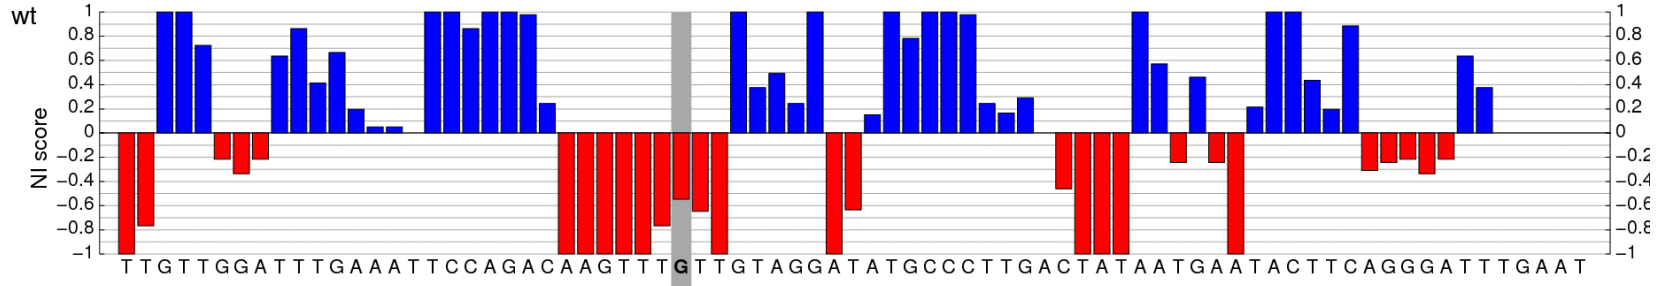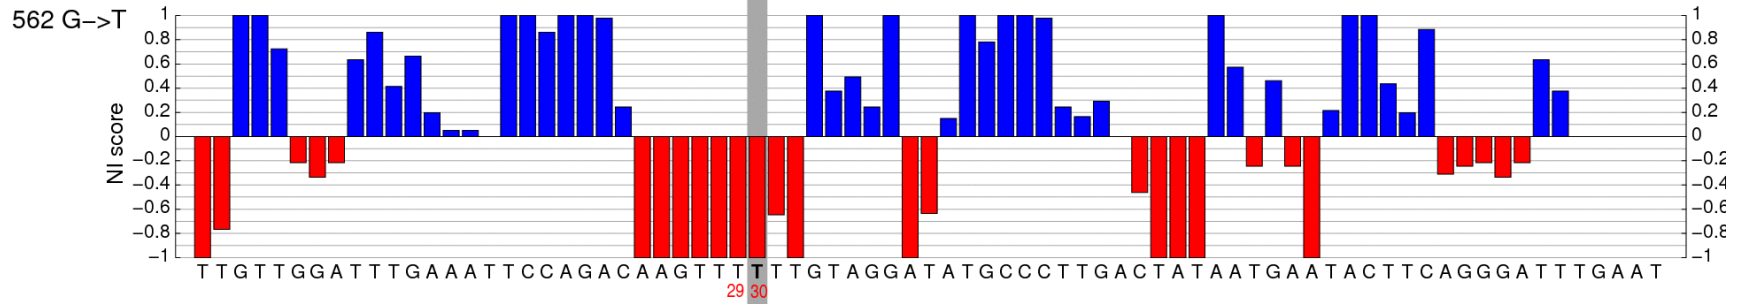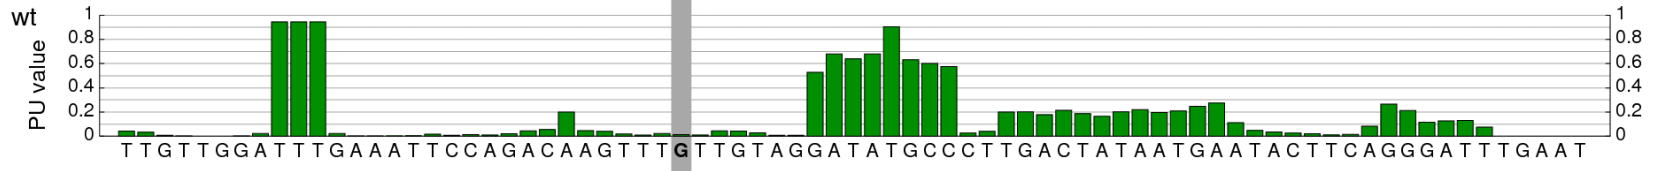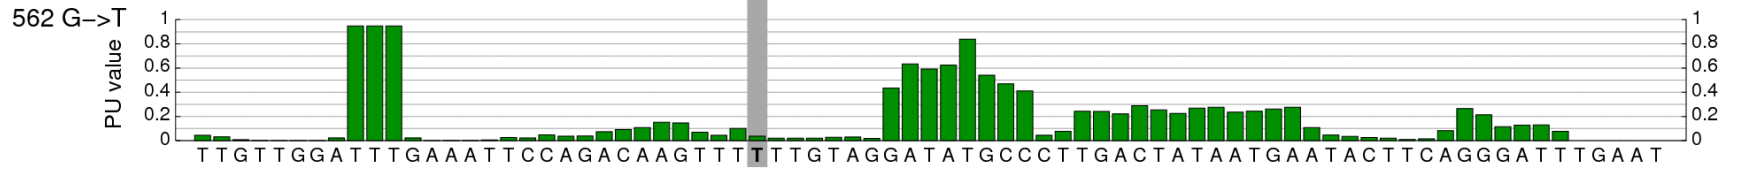

Supplement: pgen.0030204.sg009.pdf [file pgen.0030204.sg009.pdf]
